# Supplementary material for: In Vitro Antibacterial and Antibiofilm Activity of Hungarian Honeys against Respiratory Tract Bacteria
Source: MDPI journal article supplement (doi:10.3390/foods10071632), 2021-07-14
Supplement: s1 [file s1]

Table S1. Statistical data of thin layer chromatography-direct bioautography (TLC-DB) assays

| <i>Haemophilus influenzae</i>                 |             |    |             |         |           |  |
|-----------------------------------------------|-------------|----|-------------|---------|-----------|--|
| One-way ANOVA                                 | Sum of sqrs | df | Mean square | F       | p-value   |  |
| Between groups:                               | 208.724     | 3  | 69.574      | 232.600 | 6.878E-20 |  |
| Within groups:                                | 8.374       | 28 | 0.299       |         |           |  |
| Total:                                        | 217.098     | 31 |             |         |           |  |
| Tukey's pairwise comparisons                  |             |    |             |         | p-value   |  |
| black locust honey <i>vs</i> positive control |             |    |             |         | <0.001    |  |
| linden honey <i>vs</i> positive control       |             |    |             |         | <0.001    |  |
| sunflower honey <i>vs</i> positive control    |             |    |             |         | <0.001    |  |
| black locust honey <i>vs</i> linden honey     |             |    |             |         | <0.01     |  |
| black locust honey <i>vs</i> sunflower honey  |             |    |             |         | >0.05     |  |
| linden honey <i>vs</i> sunflower honey        |             |    |             |         | >0.05     |  |
| <i>Haemophilus parainfluenzae</i>             |             |    |             |         |           |  |
| One-way ANOVA                                 | Sum of sqrs | df | Mean square | F       | p-value   |  |
| Between groups:                               | 332.040     | 3  | 110.680     | 209.100 | 2.867E-19 |  |
| Within groups:                                | 14.819      | 28 | 0.529       |         |           |  |
| Total:                                        | 346.859     | 31 |             |         |           |  |
| Tukey's pairwise comparisons                  |             |    |             |         | p-value   |  |
| black locust honey <i>vs</i> positive control |             |    |             |         | <0.001    |  |
| linden honey <i>vs</i> positive control       |             |    |             |         | <0.001    |  |
| sunflower honey <i>vs</i> positive control    |             |    |             |         | <0.001    |  |
| black locust honey <i>vs</i> linden honey     |             |    |             |         | <0.05     |  |
| black locust honey <i>vs</i> sunflower honey  |             |    |             |         | >0.05     |  |
| linden honey <i>vs</i> sunflower honey        |             |    |             |         | >0.05     |  |
| <i>Pseudomonas aeruginosa</i>                 |             |    |             |         |           |  |
| One-way ANOVA                                 | Sum of sqrs | df | Mean square | F       | p-value   |  |
| Between groups:                               | 113.951     | 3  | 37.983      | 413.700 | 2.779E-23 |  |
| Within groups:                                | 2.570       | 28 | 0.091       |         |           |  |
| Total:                                        | 116.522     | 31 |             |         |           |  |
| Tukey's pairwise comparisons                  |             |    |             |         | p-value   |  |
| black locust honey <i>vs</i> positive control |             |    |             |         | <0.001    |  |
| linden honey <i>vs</i> positive control       |             |    |             |         | <0.001    |  |
| sunflower honey <i>vs</i> positive control    |             |    |             |         | <0.001    |  |
| black locust honey <i>vs</i> linden honey     |             |    |             |         | <0.01     |  |
| black locust honey <i>vs</i> sunflower honey  |             |    |             |         | >0.05     |  |
| linden honey <i>vs</i> sunflower honey        |             |    |             |         | >0.05     |  |
| <i>Streptococcus pneumoniae</i>               |             |    |             |         |           |  |
| One-way ANOVA                                 | Sum of sqrs | df | Mean square | F       | p-value   |  |
| Between groups:                               | 225.752     | 3  | 75.250      | 217.000 | 1.747E-19 |  |
| Within groups:                                | 9.709       | 28 | 0.346       |         |           |  |
| Total:                                        | 235.461     | 31 |             |         |           |  |
| Tukey's pairwise comparisons                  |             |    |             |         | p-value   |  |
| black locust honey <i>vs</i> positive control |             |    |             |         | <0.001    |  |
| linden honey <i>vs</i> positive control       |             |    |             |         | <0.001    |  |
| sunflower honey <i>vs</i> positive control    |             |    |             |         | <0.001    |  |
| black locust honey <i>vs</i> linden honey     |             |    |             |         | >0.05     |  |
| black locust honey <i>vs</i> sunflower honey  |             |    |             |         | <0.05     |  |
| linden honey <i>vs</i> sunflower honey        |             |    |             |         | <0.001    |  |

**Table S2. Statistical data of agar well diffusion assays**

| <i>Haemophilus influenzae</i> 25%             |             |    |             |         |           |  |
|-----------------------------------------------|-------------|----|-------------|---------|-----------|--|
| One-way ANOVA                                 | Sum of sqrs | df | Mean square | F       | p-value   |  |
| Between groups:                               | 19.615      | 4  | 4.903       | 117.500 | 7.96E-16  |  |
| Within groups:                                | 1.043       | 25 | 0.041       |         |           |  |
| Total:                                        | 20.658      | 29 |             |         |           |  |
| Tukey's pairwise comparisons                  |             |    |             |         | p-value   |  |
| black locust honey 25% vs sugar solution 25%  |             |    |             |         | <0.01     |  |
| black locust honey 25% vs antibiotic control  |             |    |             |         | <0.001    |  |
| linden honey 25% vs sugar solution 25%        |             |    |             |         | <0.001    |  |
| linden honey 25% vs antibiotic control        |             |    |             |         | <0.001    |  |
| sunflower honey 25% vs sugar solution 25%     |             |    |             |         | >0.05     |  |
| sunflower honey 25% vs antibiotic control     |             |    |             |         | <0.001    |  |
| black locust honey 25% vs linden honey 25%    |             |    |             |         | >0.05     |  |
| black locust honey 25% vs sunflower honey 25% |             |    |             |         | >0.05     |  |
| linden honey 25% vs sunflower honey 25%       |             |    |             |         | >0.05     |  |
| sugar solution 25% vs antibiotic control      |             |    |             |         | <0.001    |  |
| <i>Haemophilus influenzae</i> 50%             |             |    |             |         |           |  |
| One-way ANOVA                                 | Sum of sqrs | df | Mean square | F       | p-value   |  |
| Between groups:                               | 14.928      | 4  | 3.732       | 72.050  | 2.364E-13 |  |
| Within groups:                                | 1.295       | 25 | 0.051       |         |           |  |
| Total:                                        | 16.223      | 29 |             |         |           |  |
| Tukey's pairwise comparisons                  |             |    |             |         | p-value   |  |
| black locust honey 50% vs sugar solution 50%  |             |    |             |         | <0.05     |  |
| black locust honey 50% vs antibiotic control  |             |    |             |         | <0.001    |  |
| linden honey 50% vs sugar solution 50%        |             |    |             |         | <0.001    |  |
| linden honey 50% vs antibiotic control        |             |    |             |         | <0.001    |  |
| sunflower honey 50% vs sugar solution 50%     |             |    |             |         | <0.05     |  |
| sunflower honey 50% vs antibiotic control     |             |    |             |         | <0.001    |  |
| black locust honey 50% vs linden honey 50%    |             |    |             |         | >0.05     |  |
| black locust honey 50% vs sunflower honey 50% |             |    |             |         | >0.05     |  |
| linden honey 50% vs sunflower honey 50%       |             |    |             |         | >0.05     |  |
| sugar solution 50% vs antibiotic control      |             |    |             |         | <0.001    |  |
| <i>Haemophilus parainfluenzae</i> 25%         |             |    |             |         |           |  |
| One-way ANOVA                                 | Sum of sqrs | df | Mean square | F       | p-value   |  |
| Between groups:                               | 19.968      | 4  | 4.992       | 99.180  | 5.85E-15  |  |
| Within groups:                                | 1.258       | 25 | 0.050       |         |           |  |
| Total:                                        | 21.227      | 29 |             |         |           |  |
| Tukey's pairwise comparisons                  |             |    |             |         | p-value   |  |
| black locust honey 25% vs sugar solution 25%  |             |    |             |         | <0.05     |  |
| black locust honey 25% vs antibiotic control  |             |    |             |         | <0.001    |  |
| linden honey 25% vs sugar solution 25%        |             |    |             |         | <0.001    |  |
| linden honey 25% vs antibiotic control        |             |    |             |         | <0.001    |  |
| sunflower honey 25% vs sugar solution 25%     |             |    |             |         | >0.01     |  |
| sunflower honey 25% vs antibiotic control     |             |    |             |         | <0.001    |  |
| black locust honey 25% vs linden honey 25%    |             |    |             |         | >0.05     |  |
| black locust honey 25% vs sunflower honey 25% |             |    |             |         | >0.05     |  |
| linden honey 25% vs sunflower honey 25%       |             |    |             |         | >0.05     |  |
| sugar solution 25% vs antibiotic control      |             |    |             |         | <0.001    |  |

*Haemophilus parainfluenzae* 50%

| One-way ANOVA   | Sum of sqrs | df | Mean square | F      | p-value  |
|-----------------|-------------|----|-------------|--------|----------|
| Between groups: | 15.832      | 4  | 3.958       | 73.480 | 1.89E-13 |
| Within groups:  | 1.346       | 25 | 0.053       |        |          |
| Total:          | 17.178      | 29 |             |        |          |

| Tukey's pairwise comparisons                  | p-value |
|-----------------------------------------------|---------|
| black locust honey 50% vs sugar solution 50%  | <0.01   |
| black locust honey 50% vs antibiotic control  | <0.001  |
| linden honey 50% vs sugar solution 50%        | <0.001  |
| linden honey 50% vs antibiotic control        | <0.001  |
| sunflower honey 50% vs sugar solution 50%     | <0.01   |
| sunflower honey 50% vs antibiotic control     | <0.001  |
| black locust honey 50% vs linden honey 50%    | >0.05   |
| black locust honey 50% vs sunflower honey 50% | >0.05   |
| linden honey 50% vs sunflower honey 50%       | >0.05   |
| sugar solution 50% vs antibiotic control      | <0.001  |

*Pseudomonas aeruginosa* 25%

| One-way ANOVA   | Sum of sqrs | df | Mean square | F       | p-value  |
|-----------------|-------------|----|-------------|---------|----------|
| Between groups: | 26.335      | 4  | 6.583       | 298.400 | 1.06E-20 |
| Within groups:  | 0.551       | 25 | 0.022       |         |          |
| Total:          | 26.887      | 29 |             |         |          |

| Tukey's pairwise comparisons                  | p-value |
|-----------------------------------------------|---------|
| black locust honey 25% vs sugar solution 25%  | >0.05   |
| black locust honey 25% vs antibiotic control  | <0.001  |
| linden honey 25% vs sugar solution 25%        | <0.001  |
| linden honey 25% vs antibiotic control        | <0.001  |
| sunflower honey 25% vs sugar solution 25%     | >0.05   |
| sunflower honey 25% vs antibiotic control     | <0.001  |
| black locust honey 25% vs linden honey 25%    | >0.05   |
| black locust honey 25% vs sunflower honey 25% | >0.05   |
| linden honey 25% vs sunflower honey 25%       | <0.001  |
| sugar solution 25% vs antibiotic control      | <0.001  |

*Pseudomonas aeruginosa* 50%

| One-way ANOVA   | Sum of sqrs | df | Mean square | F       | p-value  |
|-----------------|-------------|----|-------------|---------|----------|
| Between groups: | 26.335      | 4  | 6.583       | 298.400 | 1.06E-20 |
| Within groups:  | 0.551       | 25 | 0.022       |         |          |
| Total:          | 26.887      | 29 |             |         |          |

| Tukey's pairwise comparisons                  | p-value |
|-----------------------------------------------|---------|
| black locust honey 50% vs sugar solution 50%  | <0.01   |
| black locust honey 50% vs antibiotic control  | <0.001  |
| linden honey 50% vs sugar solution 50%        | <0.001  |
| linden honey 50% vs antibiotic control        | <0.001  |
| sunflower honey 50% vs sugar solution 50%     | <0.01   |
| sunflower honey 50% vs antibiotic control     | <0.001  |
| black locust honey 50% vs linden honey 50%    | >0.05   |
| black locust honey 50% vs sunflower honey 50% | >0.05   |
| linden honey 50% vs sunflower honey 50%       | >0.05   |
| sugar solution 50% vs antibiotic control      | <0.001  |

*Streptococcus pneumoniae* 25%

| One-way ANOVA   | Sum of sqrs | df | Mean square | F       | p-value  |
|-----------------|-------------|----|-------------|---------|----------|
| Between groups: | 25.258      | 4  | 6.314       | 117.100 | 8.31E-16 |
| Within groups:  | 1.348       | 25 | 0.053       |         |          |
| Total:          | 26.607      | 29 |             |         |          |

| Tukey's pairwise comparisons                  | p-value |
|-----------------------------------------------|---------|
| black locust honey 25% vs sugar solution 25%  | <0.001  |
| black locust honey 25% vs antibiotic control  | <0.001  |
| linden honey 25% vs sugar solution 25%        | <0.001  |
| linden honey 25% vs antibiotic control        | <0.001  |
| sunflower honey 25% vs sugar solution 25%     | <0.05   |
| sunflower honey 25% vs antibiotic control     | <0.001  |
| black locust honey 25% vs linden honey 25%    | >0.05   |
| black locust honey 25% vs sunflower honey 25% | >0.05   |
| linden honey 25% vs sunflower honey 25%       | <0.05   |
| sugar solution 25% vs antibiotic control      | <0.001  |

*Streptococcus pneumoniae* 50%

| One-way ANOVA   | Sum of sqrs | df | Mean square | F       | p-value  |
|-----------------|-------------|----|-------------|---------|----------|
| Between groups: | 16.852      | 4  | 4.213       | 107.300 | 2.33E-15 |
| Within groups:  | 0.981       | 25 | 0.039       |         |          |
| Total:          | 17.833      | 29 |             |         |          |

| Tukey's pairwise comparisons                  | p-value |
|-----------------------------------------------|---------|
| black locust honey 50% vs sugar solution 50%  | <0.001  |
| black locust honey 50% vs antibiotic control  | <0.001  |
| linden honey 50% vs sugar solution 50%        | <0.001  |
| linden honey 50% vs antibiotic control        | <0.001  |
| sunflower honey 50% vs sugar solution 50%     | <0.001  |
| sunflower honey 50% vs antibiotic control     | <0.001  |
| black locust honey 50% vs linden honey 50%    | >0.05   |
| black locust honey 50% vs sunflower honey 50% | >0.05   |
| linden honey 50% vs sunflower honey 50%       | >0.05   |
| sugar solution 50% vs antibiotic control      | <0.001  |

Table S3. Statistical data of antibiofilm assays

| <i>Haemophilus influenzae</i>                |             |     |             |        |          |  |
|----------------------------------------------|-------------|-----|-------------|--------|----------|--|
| Mann-Whitney pairwise comparisons            |             |     |             |        | p-value  |  |
| black locust honey <i>vs</i> linden honey    |             |     |             |        | <0.001   |  |
| black locust honey <i>vs</i> sunflower honey |             |     |             |        | <0.001   |  |
| linden honey <i>vs</i> sunflower honey       |             |     |             |        | <0.001   |  |
| <i>Haemophilus parainfluenzae</i>            |             |     |             |        |          |  |
| Mann-Whitney pairwise comparisons            |             |     |             |        | p-value  |  |
| black locust honey <i>vs</i> linden honey    |             |     |             |        | <0.001   |  |
| black locust honey <i>vs</i> sunflower honey |             |     |             |        | <0.001   |  |
| linden honey <i>vs</i> sunflower honey       |             |     |             |        | <0.001   |  |
| <i>Pseudomonas aeruginosa</i>                |             |     |             |        |          |  |
| Mann-Whitney pairwise comparisons            |             |     |             |        | p-value  |  |
| black locust honey <i>vs</i> linden honey    |             |     |             |        | <0.001   |  |
| black locust honey <i>vs</i> sunflower honey |             |     |             |        | <0.001   |  |
| linden honey <i>vs</i> sunflower honey       |             |     |             |        | <0.001   |  |
| <i>Streptococcus pneumoniae</i>              |             |     |             |        |          |  |
| One-way ANOVA                                | Sum of sqrs | df  | Mean square | F      | p-value  |  |
| Between groups:                              | 2306.200    | 2   | 1153.100    | 34.560 | 1.98E-13 |  |
| Within groups:                               | 6005.490    | 180 | 33.363      |        |          |  |
| Total:                                       | 8311.690    | 182 |             |        |          |  |
| Tukey's pairwise comparisons                 |             |     |             |        | p-value  |  |
| black locust honey <i>vs</i> linden honey    |             |     |             |        | <0.001   |  |
| black locust honey <i>vs</i> sunflower honey |             |     |             |        | >0.05    |  |
| linden honey <i>vs</i> sunflower honey       |             |     |             |        | <0.001   |  |
